# Supplementary material for: Association of Genetic Variants Influencing Lipid Levels with Coronary Artery Disease in Japanese Individuals
Source: PLoS One. 2012 Sep 26;7(9):e46385. doi: 10.1371/journal.pone.0046385 (PMC3458872; doi:10.1371/journal.pone.0046385)
Supplement: Table S1 — A list of SNPs at the lipid-associated loci, previously reported in European GWAS (XLS) [file pone.0046385.s002.xls]

## Sheet: Suppl Table I
Table S1. A list of SNPs at the lipid-associated loci, previously reported in European GWAS
Locus		PCSK9						ANGPTL3						SORT1						APOB
	SNP	Chr	BP_ 36.3	Trait	Ref.		SNP	Chr	BP_ 36.3	Trait	Ref.		SNP	Chr	BP_ 36.3	Trait	Ref.		SNP	Chr	BP_ 36.3	Trait	Ref.
	rs11206510*	1	55268627	LDL	1,4,5		rs1167998	1	62704220	TG	3		rs4970834	1	109616403	LDL	6,8		rs6754295	2	21059688	HDL,TG	3
	rs2479409	1	55277238	LDL	11		rs2131925	1	62798530	TG	11		rs12740374	1	109619113	LDL	4,6		rs7557067	2	21061717	TG	4
	rs11591147	1	55278235	LDL	2,12		rs1748195	1	62822181	TG	1,5		rs629301	1	109619829	LDL	6,11		rs1042034	2	21078786	TG	11
							rs12042319	1	62822407	TG	8		rs646776*	1	109620053	LDL	2.3,5,6,7,8		rs676210*	2	21085029	TG	9
							rs10889353*	1	62890784	TG	3,4,7		rs602633	1	109623034	LDL	1,6		rs693*	2	21085700	LDL, TG	1,2,3,5,6,7
							rs12130333	1	62964365	TG	2,5,7		rs599839	1	109623689	LDL	1,2,6,8		rs673548	2	21091049	TG	3,5
																			rs1367117	2	21117405	LDL	11
																			rs7575840*	2	21126995	LDL	6
																			rs515135*	2	21139562	LDL	1,4,12
																			rs562338	2	21141826	LDL	1,5,6,8
																			rs754523*	2	21165196	LDL	1
Locus		GCKR						AFF1						HMGCR						BAZ1B_MLXIPL
	SNP	Chr	BP_ 36.3	Trait	Ref.		SNP	Chr	BP_ 36.3	Trait	Ref.		SNP	Chr	BP_ 36.3	Trait	Ref.		SNP	Chr	BP_ 36.3	Trait	Ref.
	rs1260326	2	27584444	TG	1,4,5,7,11		rs442177*	4	88249285	TG	11,12		rs12654264	5	74684359	LDL	2,5		rs2240466	7	72494205	TG	3
	rs780094*	2	27594741	TG	1,2,3,5,7,8								rs3846662*	5	74686840	LDL	3,7		rs714052	7	72502805	TG	4
													rs3846663	5	74691482	LDL	4		rs2074755	7	72515102	TG	8
													rs12916	5	74692295	LDL	11,12		rs17145738*	7	72620810	TG	1,2,5,11
Locus		KLF14						LPL						TRIB1						ABCA1
	SNP	Chr	BP_ 36.3	Trait	Ref.		SNP	Chr	BP_ 36.3	Trait	Ref.		SNP	Chr	BP_ 36.3	Trait	Ref.		SNP	Chr	BP_ 36.3	Trait	Ref.
	rs4731702*	7	130083924	LDL	9,11		rs328*	8	19864004	HDL,TG	2,5,7,10		rs17321515*	8	126555591	TG	1,2,5		rs4149274	9	106679235	HDL	1
							rs2197089*	8	19870653	HDL,TG	1		rs2954029	8	126560154	TG	1,4,11,12		rs4149268*	9	106687041	HDL	1,5,7
							rs10096633	8	19875201	HDL,TG	3,5,10		rs6987702	8	126573908	TC	3		rs3890182*	9	106687476	HDL	2,5,8,12
							rs17482753	8	19876926	HDL,TG	8,10								rs3905000	9	106696891	HDL	3
							rs12678919	8	19888502	HDL,TG	1,4,10,11								rs1883025	9	106704122	HDL	4,11
							rs10503669	8	19891970	HDL,TG	1,10								rs2515614	9	106724139	HDL	9
							rs17411031	8	19896590	HDL	8,10
							rs2083637	8	19909455	HDL	3,10
							rs6993414	8	19947198	TG	1,10
							rs6586891	8	19958878	HDL	1
Locus		ABO						BUD13_APOA1-A5						HNF1A						SCARB1
	SNP	Chr	BP_ 36.3	Trait	Ref.		SNP	Chr	BP_ 36.3	Trait	Ref.		SNP	Chr	BP_ 36.3	Trait	Ref.		SNP	Chr	BP_ 36.3	Trait	Ref.
	rs507666*	9	135139220	LDL	9		rs12272004	11	116108934	TG	3,7		rs1169288	12	119901033	LDL	11		rs838880	12	123827546	HDL	11
	rs635634	9	135144821	LDL	11		rs28927680	11	116124283	HDL,TG	2,5		rs1169300*	12	119915608	LDL	9		rs11615630	12	123907823	HDL	10
							rs964184*	11	116154127	TG	1,4,11
							rs12286037	11	116157417	TG	1,5
							rs6589566	11	116157633	TG	8
							rs662799*	11	116168917	TG	1,7
Locus		LIPC						CETP						LCAT						LIPG
	SNP	Chr	BP_ 36.3	Trait	Ref.		SNP	Chr	BP_ 36.3	Trait	Ref.		SNP	Chr	BP_ 36.3	Trait	Ref.		SNP	Chr	BP_ 36.3	Trait	Ref.
	rs4775041	15	56461987	HDL,TG	1,5		rs12596776	16	55476849	HDL	1		rs2271293	16	66459571	HDL	3,4		rs7240405	18	45413088	HDL	10
	rs10468017	15	56465804	HDL	1,4		rs9989419	16	55542640	HDL	1,7,8,10,12		rs16942887	16	66485543	HDL	11		rs7241918	18	45414951	HDL	10,11
	rs1532085*	15	56470658	HDL	3,5,9,11		rs173539	16	55545545	HDL	4,10		rs255049*	16	66570972	HDL	5		rs4939883*	18	45421212	HDL	1,3,4,7,10
	rs1800588*	15	56510967	HDL	2,5,7		rs3764261*	16	55550825	HDL	1,5,7,10,11								rs2156552	18	45435666	HDL	1,2,5,10,12
	rs261332*	15	56514617	HDL	1,8		rs17231506	16	55552029	HDL	10
							rs1800775*	16	55552737	HDL	2,5,10
							rs1864163	16	55554734	HDL	1,10
							rs1532624*	16	55562980	HDL	3,10
							rs1566439	16	55582163	HDL	1
Locus		LDLR						APOE-C1
	SNP	Chr	BP_ 36.3	Trait	Ref.		SNP	Chr	BP_ 36.3	Trait	Ref.		SNP	Chr	BP_ 36.3	Trait	Ref.		SNP	Chr	BP_ 36.3	Trait	Ref.
	rs11668477*	19	11056030	LDL	5,6		rs4803750*	19	49939467	LDL	6,7
	rs6511720	19	11063306	LDL	1,2,4,5,7,11		rs10402271	19	50021054	LDL	1,6
	rs2228671	19	11071912	LDL	3,6		rs157580	19	50087106	LDL,TG	3,5
	rs688*	19	11088602	LDL	8		rs2075650	19	50087459	LDL	3,6
							rs439401	19	50106291	TG	3,11
							rs4420638*	19	50114786	LDL	1,2,4,5,6,8,11
							rs16979595	19	50169221	HDL	8
SNPs with asterisks (or their proxies) were directly genotyped in the present study. Underlined SNPs are either mono-morphic or rare (MAF<0.03) in HapMap JPT.
SNPs highlighted in gray are in marginal or weak LD (r2<0.4 in HapMap CEU) with those genotyped at the corresponding loci in the present study.
References are: 1) Willer et al. Nat Genet. 2008 (ref.6); 2) Kathiresan et al. Nat Genet. 2008 (ref.7); 3) Aulchenko et al. Nat Genet. 2009 (ref.8); 4) Kathiresan et al. Nat Genet. 2009 (ref.9); 5) Sabatti et al. Nat Genet. 2009 (ref.10); 6) Sandhu et al. Lancet 2008 (ref.11); 7) Chasman et al. Circ Cardovasc Genet. 2008 (ref.12); 8) Wallace et al. Am J Hum Genet. 2008 (ref.13); 9) Chasman et al.…
