# Supplementary material for: Association of Genetic Variants Influencing Lipid Levels with Coronary Artery Disease in Japanese Individuals
Source: PLoS One. 2012 Sep 26;7(9):e46385. doi: 10.1371/journal.pone.0046385 (PMC3458872; doi:10.1371/journal.pone.0046385)
Supplement: Table S2 — SNPs tested for lipid association in the Japanese (XLS) [file pone.0046385.s003.xls]

## Sheet: Suppl Table II
Table S2. SNPs tested for lipid association in the Japanese
Gene	SNP	Chr	BP_ 36.3	Alleles (coded / other)	Coded allele freq. in Japanese		LDL cholesterol (N=4990)				HDL cholesterol (N=4990)				Triglycerides (N=4990)										Tier 1 CAD case-control panel (1347 cases, 1337 controls)
						BETA f	SEM f	P-value		BETA f	SEM f	P-value		BETA f	SEM f	P-value		Case	Control		OR0025	OR0975			Coded allele freq.		CAD_ OR	(95% CI)	CAD_P
																									Case	Control
PCSK9	rs11206510	1	55268627	T/C	0.947584	0.0211259	0.045329	0.641195		-0.00525777	0.0452337	0.90747		0.0370717	0.0452131	0.412294		0.95245	0.94461	1.17454	0.921659	1.49745	(0.92–1.50)		0.95249	0.94461	1.1755	(0.92–1.51)	0.193075
ANGPTL3	rs10889353	1	62890784	A/C	0.851073	0.0448378	0.0283684	0.114044		-0.0113175	0.0282486	0.688702		0.116617	0.0281686	3.53113e-05									0.854	0.8594	0.956938	(0.82–1.11)	0.5703
SORT1	rs611917a	1	109616775	A/G	0.92963	0.251678	0.0382939	5.46964e-11		-0.0222782	0.0382765	0.56057		0.0151699	0.0382746	0.691869		0.93625	0.92665	1.16266	0.93633	1.44342	(0.94–1.44)		0.93541	0.92665	1.16362	(0.93–1.45)	0.171623
APOB	rs676210	2	21085029	C/T	0.2688	-0.0311263	0.0228421	0.173048		-0.0676865	0.0227301	0.00291702		7.89824e-05	0.0227323	0.997228									0.2572	0.2622	0.9748	(0.86–1.10)	0.6813
APOB	rs693	2	21085700	A/G	0.0486147	0.11998	0.0470463	0.0107945		-0.0210131	0.0469148	0.654246		0.0413621	0.0468717	0.377574		0.04792	0.03895	1.242	0.9537	1.617	(0.95–1.62)		0.04788	0.03895	1.241	(0.95–1.63)	0.111614
APOB	rs7575840	2	21126995	T/G	0.0972973	0.0732427	0.0341871	0.0322098		0.0368524	0.0340535	0.279221		-0.00625479	0.0340456	0.854242		0.0959	0.08795	1.1	0.9136	1.324	(0.91–1.32)		0.09515	0.08527	1.128	(0.94–1.36)	0.2069
APOB	rs515135	2	21139562	C/T	0.892301	-0.0644397	0.0324367	0.0470195		0.00252163	0.0323008	0.937778		-0.00649596	0.0322599	0.840423		0.8803	0.892	0.891266			(0.75–1.06)		0.8801	0.8927	0.882613	(0.75–1.05)	0.1477
APOB	rs754523	2	21165196	C/T	0.223375	-0.000647161	0.0241142	0.978591		-0.0274342	0.023949	0.252045		-0.0200628	0.023942	0.402085									0.2225	0.2187	1.022	(0.90–1.16)	0.7398
GCKR	rs780094	2	27594741	A/G	0.55999	0.0144428	0.0205142	0.48144		-0.0260764	0.020398	0.201174		0.125742	0.0202912	6.22617e-10									0.5698	0.5471	1.09649	(0.98–1.22)	0.09425
AFF1	rs442177	4	88249285	A/C	0.522016	0.0372324	0.0202244	0.0656866		-0.00885258	0.0201356	0.660212		0.0403979	0.0201283	0.0448015									0.5216	0.5262	0.981354	(0.88–1.09)	0.735
AFF1	rs236681b	4	88207532	G/T	0.364865	0.0410123	0.0210033	0.0509167		-0.0472532	0.0208845	0.0237038		0.0481771	0.0208892	0.0211338									0.3737	0.3557	1.081	(0.97–1.21)	0.1722
HMGCR	rs3846662	5	74686840	G/A	0.523985	0.0845963	0.0201711	2.79005e-05		0.00597783	0.0201013	0.766185		0.0288592	0.0200855	0.150833		0.5189	0.5334	0.943396	0.847458	1.05064	(0.85–1.05)		0.5189	0.5334	0.943396	(0.85–1.05)	0.2894
BAZ1B_MLXIPL	rs2286276	7	72625290	G/A	0.898405	-0.0315142	0.0338049	0.35126		-0.142059	0.0335542	2.34052e-05		0.091345	0.0335556	0.00650766									0.90713	0.90367	1.04123	(0.87–1.25)	0.6652
KLF14	rs4731702	7	130083924	C/T	0.697995	0.00594838	0.0220368	0.787226		-0.0311014	0.021939	0.156361		0.0371115	0.0219275	0.09062									0.7034	0.7131	0.954198	(0.85–1.07)	0.4377
KLF14 (M)	rs4731702	7	130083924	C/T	0.699971	-0.0111342	0.0290347	0.701393		0.0171849	0.0291923	0.556121		0.0173961	0.0302534	0.565326									0.6909	0.7053	0.933707	(0.81–1.08)	0.3596
KLF14 (F)	rs4731702	7	130083924	C/T	0.695037	0.0319379	0.0337802	0.344538		-0.104229	0.0329745	0.00159669		0.0693977	0.0306772	0.023794									0.7391	0.7227	1.08719	(0.87–1.37)	0.4731
LPL	rs269b	8	19857947	T/G	0.790382	-0.0120205	0.0247386	0.627059		-0.0836927	0.0246223	0.000681519		0.102571	0.0246041	3.11385e-05									0.7926	0.7887	1.02354	(0.90–1.17)	0.7283
LPL	rs328	8	19864004	C/G	0.870183	0.0377023	0.029355	0.199079		-0.211161	0.0291268	4.82064e-13		0.177922	0.0291501	1.1156e-09									0.8785	0.8736	1.04646	(0.89–1.23)	0.5836
LPL	rs2197089	8	19870653	C/T	0.727479	0.0163011	0.0227475	0.473649		-0.114921	0.0225947	3.7872e-07		0.110936	0.0225836	9.29255e-07									0.7403	0.7214	1.1012	(0.98–1.24)	0.1176
TRIB1	rs6982636	8	126548497	A/G	0.488319	0.0083306	0.0200602	0.677955		-0.0292459	0.0199575	0.142872		0.0461847	0.019931	0.0205315									0.513	0.5194	0.974659	(0.88–1.08)	0.6372
ABCA1	rs2066714b	9	106626574	A/G	0.372684	-0.00645885	0.0208332	0.756554		-0.0629838	0.0206918	0.00234754		0.0342319	0.0206712	0.0977804									0.3584	0.3732	0.9382	(0.84–1.05)	0.2607
ABCA1	rs2472386b	9	106641362	C/T	0.201696	0.00779138	0.0249585	0.754922		-0.0606516	0.0248349	0.0146332		0.0538003	0.0248004	0.0301049									0.2004	0.1918	1.057	(0.92–1.21)	0.4274
ABCA1	rs2000069b	9	106675690	T/C	0.345531	-0.00948913	0.0209767	0.651026		-0.0876538	0.0208413	2.64761e-05		-0.00987638	0.0208653	0.635991									0.3518	0.356	0.9818	(0.88–1.10)	0.748
ABCA1	rs4149268	9	106687041	A/G	0.352566	-0.0132568	0.0209262	0.526435		-0.0903153	0.0207727	1.40269e-05		-0.0176174	0.0207924	0.396869									0.356	0.3746	0.9227	(0.83–1.03)	0.156
ABCA1	rs2275545	9	106691347	G/A	0.0589158	-0.0713638	0.0428065	0.0955537		-0.0718079	0.0425453	0.0915129		-0.0922932	0.0425339	0.0300637									0.06422	0.0632	1.017	(0.82–1.27)	0.8789
ABCA1	rs4149263b	9	106717110	T/C	0.831616	-0.0117428	0.0270099	0.663757		-0.0817006	0.0268549	0.00236008		0.0289304	0.0268269	0.280903									0.8273	0.8123	1.10693	(0.96–1.27)	0.1529
ABO	rs507666	9	135139220	A/G	0.280199	0.0977278	0.0222583	1.15397e-05		-0.0132563	0.0221839	0.55016		0.00731693	0.0221684	0.741368		0.2986	0.2931	1.027	0.9124	1.156	(0.91–1.16)		0.2992	0.2921	1.035	(0.92–1.17)	0.5721
BUD13_APOA1-A5	rs180326	11	116129913	C/A	0.268902	0.0317671	0.0227794	0.163214		-0.108635	0.0224565	1.35407e-06		0.224483	0.0222611	1.09786e-23									0.2703	0.2624	1.041	(0.92–1.18)	0.5135
BUD13_APOA1-A5	rs3741301b	11	116136601	A/G	0.771868	0.0267709	0.0238877	0.262472		-0.0690753	0.0237624	0.00366628		0.180428	0.0236255	2.6526e-14									0.7817	0.7704	1.06758	(0.94–1.21)	0.3183
BUD13_APOA1-A5	rs662799	11	116168917	G/A	0.336966	0.0722722	0.0212788	0.000688099		-0.191191	0.0209063	8.51086e-20		0.321985	0.0205669	5.8403e-54									0.3447	0.3295	1.071	(0.95–1.20)	0.23289
HNF1A	rs1169300	12	119915608	A/G	0.543782	0.0216168	0.0202131	0.284923		0.0172969	0.0201023	0.389586		-0.0167119	0.0200748	0.405176									0.5349	0.5644	0.887311	(0.80–0.99)	0.02976
SCARB1	rs838867b	12	123839620	G/A	0.44169	-0.0486143	0.020335	0.0168552		0.0264345	0.0202522	0.191863		0.0541698	0.0202172	0.00739993									0.4405	0.4633	0.912	(0.82–1.02)	0.09332
LIPC	rs1532085	15	56470658	G/A	0.424777	-0.0326104	0.0203132	0.108476		-0.142468	0.0201325	1.6849e-12		-0.0684661	0.0201802	0.000697422									0.4115	0.4407	0.8874	(0.80–0.99)	0.03065
LIPC	rs1800588	15	56510967	C/T	0.503665	-0.0130105	0.0202216	0.519998		-0.157918	0.0199903	3.41782e-15		-0.0859857	0.0200285	1.79502e-05									0.5041	0.488	1.066	(0.96–1.19)	0.2394
LIPC	rs261332	15	56514617	G/A	0.685377	-0.00232407	0.0219343	0.915622		-0.142	0.0217142	6.79684e-11		-0.0536447	0.0217529	0.0136932									0.671	0.6897	0.917431	(0.82–1.03)	0.1412
LIPC	rs11858164c	15	56530023	G/T	0.217555	0.0248447	0.0243203	0.307038		-0.150944	0.0240799	3.95598e-10		-0.0499594	0.0241064	0.0382747									0.2216	0.2279	0.9641	(0.85–1.10)	0.5774
CETP	rs3764261	16	55550825	G/T	0.799756	0.0435829	0.0253555	0.0857		-0.253802	0.0249821	5.16902e-24		0.029761	0.0251523	0.236774									0.8083	0.8045	1.02438	(0.89–1.17)	0.7284
CETP	rs1800775	16	55552737	C/A	0.444561	0.0191416	0.0204434	0.349153		-0.0963159	0.0202993	2.14591e-06		0.0222211	0.0203306	0.274452									0.4502	0.4394	1.045	(0.94–1.16)	0.428
CETP	rs1532624	16	55562980	G/T	0.704486	0.0685158	0.0221057	0.0019498		-0.187397	0.0218525	1.30272e-17		0.0401655	0.021993	0.0678672									0.6978	0.6935	1.02051	(0.91–1.15)	0.7324
CETP	rs2303790c	16	55574793	A/G	0.966783	0.207739	0.0566383	0.00024723		-0.466045	0.0559749	1.07131e-16		0.0308224	0.0563083	0.584138									0.96952	0.96148	1.24777	(0.92–1.70)	0.136338
LCAT	rs255049d	16	66570972	T/C	0.844951	0.0164756	0.0278437	0.554068		-0.0560994	0.02764	0.042446		-0.0166804	0.0276234	0.545972									0.8568	0.8695	0.897666	(0.77–1.05)	0.178
LIPG	rs4939883	18	45421212	T/C	0.203852	0.00963551	0.0250235	0.70021		-0.0619723	0.0249009	0.0128516		-0.0017375	0.0249055	0.944385									0.2186	0.209	1.059	(0.93–1.21)	0.3904
LDLR	rs1122608c	19	11024601	G/T	0.881928	-0.0465307	0.0313135	0.137354		0.0364014	0.0311937	0.243289		-0.0413166	0.0311757	0.185138		0.8873	0.8834	1.03896	0.877193	1.23077	(0.88–1.23)		0.8874	0.8736	1.13986	(0.97–1.34)	0.1202
LDLR	rs11668477	19	11056030	A/G	0.850889	0.0229508	0.0281136	0.414333		-0.0391097	0.027919	0.161328		-0.00231077	0.027935	0.934078									0.8646	0.851	1.11769	(0.96–1.30)	0.1555
LDLR	rs688	19	11088602	T/C	0.126395	0.0729922	0.030178	0.0156111		-0.0125715	0.0299487	0.674674		0.0440868	0.0299045	0.140476		0.1347	0.1213	1.127	0.9598	1.323	(0.96–1.32)		0.1349	0.1213	1.13	(0.96–1.33)	0.1365
LDLR	rs1433099c	19	11103658	C/T	0.697646	0.0986375	0.0218081	6.24155e-06		0.00899558	0.021737	0.679011		-0.0132546	0.0217196	0.541718		0.7377	0.7012	1.19875	1.06394	1.35062	(1.06–1.35)		0.7379	0.7012	1.1999	(1.06–1.35)	0.00291019
APOE-C1	rs4803750	19	49939467	A/G	0.911088	-0.0185475	0.035552	0.601902		0.0151943	0.035373	0.667545		0.00941604	0.0353482	0.789958									0.90297	0.91324	0.884173	(0.73–1.06)	0.1932
APOE-C1	rs429358e	19	50103781	C/T	0.0974821	0.220546	0.0347213	2.31945e-10		-0.153207	0.0345452	9.40784e-06		0.14295	0.0344634	3.41165e-05									0.09933	0.09612	1.02282	(0.85–1.23)	0.808777
APOE-C1	rs7412e	19	50103919	C/T	0.952206	0.629357	0.0461443	1.34743e-41		-0.129883	0.046716	0.005452		-0.104899	0.0467074	0.0247554		0.97059	0.93988	2.11104	1.60231	2.78087	(1.60–2.78)		0.9705	0.94006	2.11228	(1.59–2.82)	7.14937e-08
APOE-C1	rs4420638	19	50114786	G/A	0.107074	0.187996	0.0331483	1.498e-08		-0.114153	0.0329937	0.000545043		0.10805	0.0329116	0.0010341		0.1124	0.1093	1.032	0.8698	1.225	(0.87–1.23)		0.113	0.1078	1.054	(0.89–1.25)	0.5445
A total of 22 unique loci were examined. In many cases (36 of 48 SNPs), target SNPs were chosen from those previously identified to show genome-wide significant associations with lipid traits in European GWAS (see Supplementary Table I). Proxy SNPs were genotyped at SORT1 (rs646776 is replaced by rs611917, r2=1 in JPT+CHB), BAZ1B_MLXIPL (rs17145738 is replaced by rs2286276, r2=1 in JPT+CHB), TRIB…
ars611917 is in complete LD (r2=1.0 in JPT+CHB) with rs12740374 at SORT1,which is recently reported as a causal variant in the corresponding locus (Musunuru et al. Nature 2010).
bEight SNPs were selected from top hit association signals at the individual loci based on the preliminary screening data in our GWA study panel when they showed a tendency of association (P < 0.05 by one-tailed test in a Japanese GWA study panel) within 50 kb of index SNP markers previously reported. rs269 in LD (r2=0.914 in JPT+CHB) with rs264 was genotyped at LPL. rs236681 (AFF1) is in modest …
cFour SNPs were additionally selected because they were reported to show some evidence of association with lipid traits and/or CAD.
drs255049 is in LD (r2=0.906 in JPT+CHB, r2=0.752 in CEU) with rs1109166 located in the LCAT gene.
ers429358 and rs7412 define 3 major isoforms of APOE (E2, E3, and E4).
fBETA and SEM of each trait are shown as z-score after adjustment for standard deviation (SD); the SDs are 29.04 for LDL cholesterol, 0.107 for HDL cholesterol, 0.208 for triglycerides.
