# Supplementary material for: Association of Genetic Variants Influencing Lipid Levels with Coronary Artery Disease in Japanese Individuals
Source: PLoS One. 2012 Sep 26;7(9):e46385. doi: 10.1371/journal.pone.0046385 (PMC3458872; doi:10.1371/journal.pone.0046385)
Supplement: Table S5 — Lipid and CAD phenotypes of candidate genes, reported in humans and mice (XLS) [file pone.0046385.s006.xls]

## Sheet: Suppl Table V
Table S5. Lipid and CAD phenotypes of candidate genes, reported in humans and mice
Gene	Phenotype (in OMIM)	MIM No.	Mendelian disease		Lipid associationa		Lipid profile in	Relevance to CHD (or CAD) in Mendelian disease
				LDL	HDL	TG	knock-out mouse
PCSK9	Hypercholesterolemia, familial, 3	603776	Familial hypercholesterolemia	+			chol↓	N/A
ANGPTL3	Hypobetalipoproteinemia, familial, 2	605019	Familial hypobetalipoproteinemia	+		+	chol↓, TG↓	N/A
SORT1	N/A	N/A		+			No lipid alteration	N/A
APOB	Hypercholesterolemia, due to ligand-defective apo B	144010	Familial hypobetalipoproteinemia	+	+	+	chol↓, apolipoprotein↓(Heterozygotes)	Premature CHD in patients, equivalently to those with familial hypercholesterolemia.
GCKR	N/A	N/A				+	No lipid alteration	N/A
HMGCR	N/A	N/A		+			Early embryonic lethality	N/A
LPL	Combined hyperlipidemia, familial	144250	Lipoprotein lipase deficiency		+	+	TG↑, HDL↓	Two studies reported CAD risk in patients with combined LPL mutations.
ABCA1	HDL deficiency, type 2	604091	Tangier disease		+		chol↓, HDL(-)	Premature CHD in patients with Tangier disease.
APOA5	Hyperchylomicronemia, late-onset	144650	Late-onset hyperchylomicronemia	+	+	+	TG↑, VLDL↑	Silent myocardial infarction in a patient with homozygous mutations.
HNF1A	MODY, type III	600496	MODY3	+			Impaired HDL metabolism (abnormal HDL↑)	N/A
SCARB1	N/A	N/A			+		chol↑ (ENU mutant)	N/A
LIPCb	Hepatic lipase deficiency	614025	Familial hepatic lipase deficiency		+	+	chol↑, HDL↑	N/A
CETP	Hyperalphalipoproteinemia	143470	Hyperalphalipoproteinemia	+	+	+	N/A	Equivocal findings
LCAT	N/A	N/A	Familial LCAT deficiency (fish-eye disease)		+		alpha-lipoprotein↓, TG↑	Premature CHD in patients with fish-eye disease.
LIPG	N/A	N/A			+		chol↑, HDL↑	N/A
LDLR	Hypercholesterolemia, familial	143890	Familial hypercholesterolemia	+			chol↑, LDL↑	Premature CHD in patients despite one report showing lack of CHD risk in the pedigree.
APOE	Hyperlipoproteinemia, type III	N/A	Familial dysbetalipoproteinemia	+	+	+	chol↑	N/A
Five (of 22) tested loci (AFF1, BAZ1B-MLXIPL, KLF14, TRIB1, and ABO) are not listed in the table, because no physiological relevance of the nearby genes has been reported in lipid metabolism.
aFor lipid traits that showed robust association in a GWA study meta-analysis (Teslovich et al. Nature 2010), the corresponding cells are marked '+'; the lipid traits with relatively modest genetic effects (although P<5×10-8) are highlighted in gray.
bIn LIPC (rs1532085 in the study by Teslovich et al. Nature 2010), plasma lipid profiling does not provide a clear biological mechanism for the genetic effect since both antiatherogenic HDL and atherogenic LDL/TG levels are changed in the same direction.
